# Supplementary material for: Jejunal Transcriptomic Profiling for Differences in Feed Conversion Ratio in Slow-Growing Chickens
Source: MDPI journal article supplement (doi:10.3390/ani11092606), 2021-09-05
Supplement: s1 [file s1]

**Table S1.** Primers for RNA-seq validation through RT-qPCR.

| Gene name                | Gene ID             | Accession no   | Forward primer        | Reverse primer         | Product size<br><br>(bp) | Efficiency |
|--------------------------|---------------------|----------------|-----------------------|------------------------|--------------------------|------------|
| <i>LY6E</i> <sup>a</sup> | ENSGALG00000041621  | NM_204775.1    | AGTCCATCTCCAAAGGCTGC  | TCACTGTTGGAAGCCTGC     | 349                      | 104.39%    |
| <i>PLAC8</i>             | ENSGALG00000011190  | NM_001389397.1 | GGTTTCTGTTCTGGGCTGAGT | CGTCGTCTCTACGGCATCAG   | 504                      | 98.15%     |
| <i>LOC771880</i>         | ENSGALG00000052285  | NM_205235.1    | AGCCACGTCAACAAGGACAT  | ACGATGGTGACGATCAGAGC   | 149                      | 95.99%     |
| <i>MLK</i> <sup>b</sup>  | ENSGALG00000002766  | XM_015279230.2 | CACCGATAACCAGGAGCCAGT | AGCCAGCAAGTCCACGATCT   | 123                      | 100.17%    |
| <i>AVD</i> <sup>c</sup>  | ENSGALG000000025945 | NM_205320.1    | GGCTCCAACATGACCATC    | GGTGGACTCTGAAAACCTTC   | 193                      | 100.29%    |
| <i>IFI6</i>              | ENSGALG00000013575  | NM_001001296.5 | GTCTGACCAGAACGTCCACA  | TGCCTCACCAGACATGATCG   | 88                       | 97.89%     |
| <i>PLA2G4B</i>           | ENSGALG000000008727 | XM_015287124.2 | GCTGGATGGCTTGTACTGGT  | TCCAGCACAGTGTCTGCATATC | 341                      | 96.99%     |
| <i>LBFABP</i>            | ENSGALG000000004141 | NM_204634.1    | ACCCAGGCAGACTGTGACTAA | GCACACAAGCTTCCCATTG    | 115                      | 104.17%    |
| <i>GAPDH</i> *           | ENSGALG00000014442  | NM_204305.1    | GGTGGCCATCAATGATCCCT  | CCGTTCTCAGCCTTGACAGT   | 105                      | 106.76%    |

<sup>a</sup> The primers of *LY6E* were from Zhang et al. (2008) [1].

<sup>b</sup> The primers of *MLKL* were from Zhang et al. (2020) [2].

<sup>c</sup> The primers of *AVD* were from Dayabari et al. (2015) [3].

\**GAPDH* is a housekeeping gene.

## References

1. Zhang, W.; Li, H.; Cheng, G.; Hu, S.; Li, Z.; Bi, D. Avian influenza virus infection induces differential expression of genes in chicken kidney. *Res. Vet. Sci.* **2008**, *84*, 374–381. <https://doi.org/10.1016/j.rvsc.2007.05.015>
2. Zhang, J.; Hao, X.; Xu, S. Selenium Prevents Lead-Induced Necroptosis by Restoring Antioxidant Functions and Blocking MAPK/NF-kappaB Pathway in Chicken Lymphocytes. *Biol. Trace. Elem. Res.* **2020**, *198*, 644–653. <https://doi.org/10.1007/s12011-020-02094-y>
3. Daryabari, H.; Akhlaghi, A.; Zamiri, M.J.; Pirsaraei, Z.A.; Mianji, G.R.; Deldar, H.; Eghbalian, A.N. Oral administration of supplementary biotin differentially influences the fertility rate and oviductal expression of avidin and avidin-related protein-2 in low- and high-fertility broiler line hens. *Poult. Sci.* **2015**, *94*, 289–295. <https://doi.org/10.3382/ps/peu073>

**Table S2.** Ensembl-derived GO terms associated with difference in FCR.

| Category                                       | GO ID      | Term                                                   | p-value | Genes <sup>1</sup>                                                                                                                    |
|------------------------------------------------|------------|--------------------------------------------------------|---------|---------------------------------------------------------------------------------------------------------------------------------------|
| Enrichment of GO terms biological process (BP) | GO:0006749 | glutathione metabolic process                          | 0.0020  | <b>MMACHC</b> , <b>CHAC1</b>                                                                                                          |
|                                                | GO:0006950 | response to stress                                     | 0.0052  | <b>MLKL</b> , <b>RASGRF1</b> , <b>PLAC8</b> , <b>OASL</b> , <b>TRIM27.2</b> , <b>CHAC1</b> , <b>SPON2</b> , <b>LAG3</b> , <b>KNG1</b> |
|                                                | GO:0006952 | defense response                                       | 0.0031  | <b>MLKL</b> , <b>PLAC8</b> , <b>OASL</b> , <b>TRIM27.2</b> , <b>SPON2</b> , <b>LAG3</b>                                               |
|                                                | GO:0007162 | negative regulation of cell adhesion                   | 0.0033  | <b>MYOC</b> , <b>LAG3</b> , <b>KNG1</b>                                                                                               |
|                                                | GO:0009605 | response to external stimulus                          | 0.0012  | <b>MLKL</b> , <b>PLAC8</b> , <b>OASL</b> , <b>TRIM27.2</b> , <b>SPON2</b> , <b>CDK5R1</b> , <b>LAG3</b> , <b>KNG1</b>                 |
|                                                | GO:0009607 | response to biotic stimulus                            | 0.0003  | <b>MLKL</b> , <b>PLAC8</b> , <b>OASL</b> , <b>TRIM27.2</b> , <b>SPON2</b> , <b>LAG3</b>                                               |
|                                                | GO:0009615 | response to virus                                      | 0.0035  | <b>MLKL</b> , <b>OASL</b> , <b>SPON2</b>                                                                                              |
|                                                | GO:0021700 | developmental maturation                               | 0.0057  | <b>MYOC</b> , <b>C1QL1</b> , <b>CDK5R1</b>                                                                                            |
|                                                | GO:0035023 | regulation of Rho protein signal transduction          | 0.0051  | <b>RASGRF1</b> , <b>MYOC</b>                                                                                                          |
|                                                | GO:0042551 | neuron maturation                                      | 0.0017  | <b>MYOC</b> , <b>C1QL1</b>                                                                                                            |
|                                                | GO:0043207 | response to external biotic stimulus                   | 0.0002  | <b>MLKL</b> , <b>PLAC8</b> , <b>OASL</b> , <b>TRIM27.2</b> , <b>SPON2</b> , <b>LAG3</b>                                               |
|                                                | GO:0044419 | interspecies interaction between organisms             | 0.0002  | <b>MLKL</b> , <b>PLAC8</b> , <b>OASL</b> , <b>TRIM27.2</b> , <b>SPON2</b> , <b>LAG3</b>                                               |
|                                                | GO:0048640 | negative regulation of developmental growth            | 0.0082  | <b>PLAC8</b> , <b>CDK5R1</b>                                                                                                          |
|                                                | GO:0051607 | defense response to virus                              | 0.0012  | <b>MLKL</b> , <b>OASL</b> , <b>SPON2</b>                                                                                              |
|                                                | GO:0051707 | response to other organism                             | 0.0002  | <b>MLKL</b> , <b>PLAC8</b> , <b>OASL</b> , <b>TRIM27.2</b> , <b>SPON2</b> , <b>LAG3</b>                                               |
|                                                | GO:0071695 | anatomical structure maturation                        | 0.0032  | <b>MYOC</b> , <b>C1QL1</b> , <b>CDK5R1</b>                                                                                            |
|                                                | GO:0098542 | defense response to other organism                     | 0.0002  | <b>MLKL</b> , <b>PLAC8</b> , <b>OASL</b> , <b>TRIM27.2</b> , <b>SPON2</b> , <b>LAG3</b>                                               |
|                                                | GO:0005102 | signaling receptor binding                             | 0.0086  | <b>RASGRF1</b> , <b>MYOC</b> , <b>CHAC1</b> , <b>C1QL1</b> , <b>CDK5R1</b> , <b>LAG3</b> , <b>KNG1</b>                                |
| Enrichment of GO terms molecular function (MF) | GO:0008138 | protein tyrosine/serine/threonine phosphatase activity | 0.0049  | <b>PTPDC1</b>                                                                                                                         |
|                                                | GO:0033218 | amide binding                                          | 0.0063  | <b>MMACHC</b> , <b>AVD</b> , <b>LAPTM4B</b>                                                                                           |
|                                                | GO:0035254 | glutamate receptor binding                             | 0.0007  | <b>RASGRF1</b> , <b>CDK5R1</b>                                                                                                        |

<sup>1</sup>Genes in **bold** represent those higher expressed in low-FCR jejunum.

**Table S3.** KEGG pathways associated with difference in FCR.

| Pathway ID | Term                                         | Number of genes | q-value | Genes <sup>1</sup>                                        |
|------------|----------------------------------------------|-----------------|---------|-----------------------------------------------------------|
| ko04977    | Vitamin digestion and absorption             | 1               | 0.0128  | <b><i>MMACHC</i></b>                                      |
| ko04370    | VEGF signaling pathway                       | 1               | 0.0223  | <b><i>PLA2G4B</i></b>                                     |
| ko00350    | Tyrosine metabolism                          | 1               | 0.0133  | <b><i>LOC100857280</i></b>                                |
| ko04668    | TNF signaling pathway                        | 1               | 0.0124  | <b><i>MLKL, MMP10</i></b>                                 |
| ko04660    | T cell receptor signaling pathway            | 2               | 0.0133  | <b><i>LOC107049158, LOC771880</i></b>                     |
| ko05323    | Rheumatoid arthritis                         | 1               | 0.0252  | <b><i>MMP10</i></b>                                       |
| ko00830    | Retinol metabolism                           | 1               | 0.0135  | <b><i>LOC100857280</i></b>                                |
| ko04014    | Ras signaling pathway                        | 2               | 0.0262  | <b><i>PLA2G4B, RASGRF1</i></b>                            |
| ko05340    | Primary immunodeficiency                     | 2               | 0.0086  | <b><i>LOC107049158, LOC771880</i></b>                     |
| ko04913    | Ovarian steroidogenesis                      | 1               | 0.0156  | <b><i>PLA2G4B</i></b>                                     |
| ko04217    | Necroptosis                                  | 2               | 0.0135  | <b><i>MLKL, PLA2G4B</i></b>                               |
| ko00980    | Metabolism of xenobiotics by cytochrome P450 | 1               | 0.0135  | <b><i>LOC100857280</i></b>                                |
| ko04730    | Long-term depression                         | 1               | 0.0219  | <b><i>PLA2G4B</i></b>                                     |
| ko00591    | Linoleic acid metabolism                     | 1               | 0.0133  | <b><i>PLA2G4B</i></b>                                     |
| ko04657    | IL-17 signaling pathway                      | 1               | 0.0252  | <b><i>MMP10</i></b>                                       |
| ko04640    | Hematopoietic cell lineage                   | 2               | 0.0124  | <b><i>LOC107049158, LOC771880</i></b>                     |
| ko04912    | GnRH signaling pathway                       | 1               | 0.0300  | <b><i>PLA2G4B</i></b>                                     |
| ko00010    | Glycolysis / Gluconeogenesis                 | 1               | 0.0160  | <b><i>LOC100857280</i></b>                                |
| ko00480    | Glutathione metabolism                       | 1               | 0.0135  | <b><i>CHAC1</i></b>                                       |
| ko04664    | Fc epsilon RI signaling pathway              | 1               | 0.0239  | <b><i>PLA2G4B</i></b>                                     |
| ko00071    | Fatty acid degradation                       | 1               | 0.0133  | <b><i>LOC100857280</i></b>                                |
| ko00565    | Ether lipid metabolism                       | 1               | 0.0137  | <b><i>PLA2G4B</i></b>                                     |
| ko00982    | Drug metabolism - cytochrome P450            | 1               | 0.0133  | <b><i>LOC100857280</i></b>                                |
| ko04610    | Complement and coagulation cascades          | 1               | 0.0262  | <b><i>KNG1</i></b>                                        |
| ko05030    | Cocaine addiction                            | 1               | 0.0137  | <b><i>CDK5R1</i></b>                                      |
| ko05204    | Chemical carcinogenesis                      | 1               | 0.0154  | <b><i>LOC100857280</i></b>                                |
| ko04514    | Cell adhesion molecules (CAMs)               | 3               | 0.0086  | <b><i>LOC107049158, ENSGALG00000051068, LOC771880</i></b> |
| ko00590    | Arachidonic acid metabolism                  | 1               | 0.0156  | <b><i>PLA2G4B</i></b>                                     |

|         |                                     |   |        |                                |
|---------|-------------------------------------|---|--------|--------------------------------|
| ko04612 | Antigen processing and presentation | 2 | 0.0124 | <i>LOC107049158, LOC771880</i> |
| ko00592 | alpha-Linolenic acid metabolism     | 1 | 0.0128 | <b><i>PLA2G4B</i></b>          |

---

<sup>1</sup>Genes in ***bold*** represent those higher expressed in low-FCR jejunum.
